# Supplementary material for: Nile Red-Poly(Methyl Methacrylate)/Silica Nanocomposite Particles Increase the Sensitivity of Cervical Cancer Cells to Tamoxifen
Source: PubMed Central journal article supplement (PMC7408027; doi:10.3390/polym12071516), 2020-07-08
Supplement: polymers-12-01516-s001.pdf [file polymers-12-01516-s001.pdf]

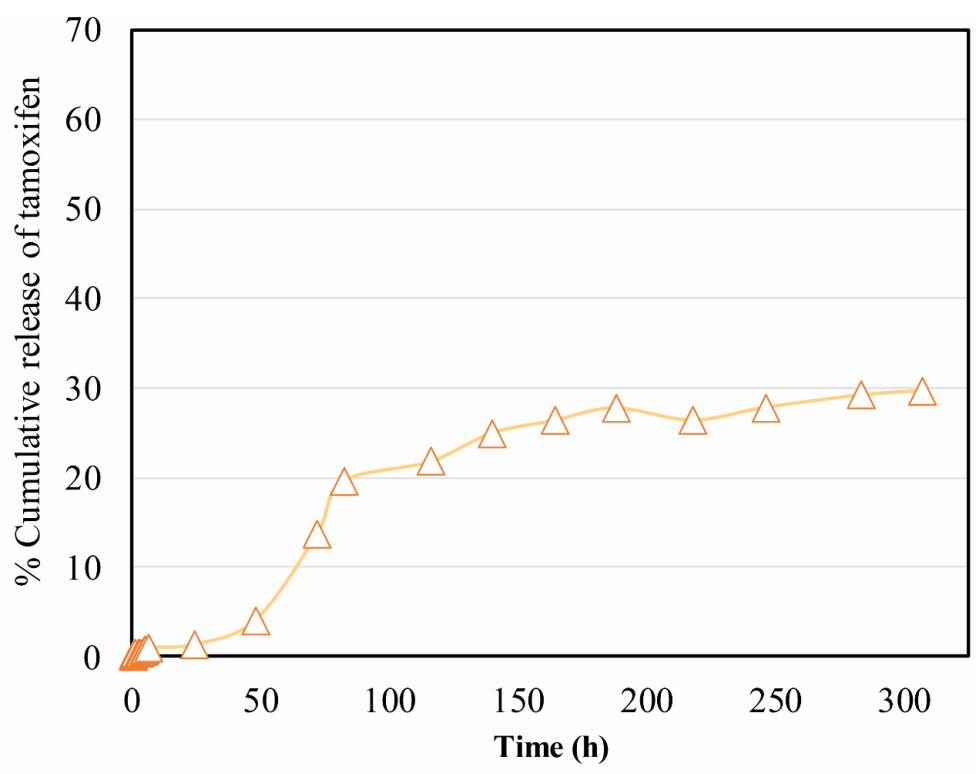

**Figure S1.** Tamoxifen release profile from PMMA-NR-Si-TAM.
